# Supplementary material for: Credit Default of Local Public Sectors in Chinese Government‐Pay PPP Projects: Evidence from Ecological Construction
Source: Hindawi journal article supplement (doi:10.1155/2019/2138525), 2019-01-01
Supplement: f1 [file 2138525.f1.pdf]

## **Appendix 1**

Dear Sir or Madam:

This a questionnaire for the research of ‘Credit Default of Local Public Sectors in Chinese Government-Pay PPP Projects’. You have been selected to be one of the respondents considering your experience working in Government-Pay PPP projects. We hope we can invite you to complete the questionnaire at your convenience. When you complete the questionnaire, please send it back through e-mail or WeChat as soon as possible. We would appreciate your promptness in returning the questionnaire to us.

Thanks you and we look forward to your reply.

Name: Gender: Age:

Experience working in PPP (Years):

Organization/Authority Name:

Position:

Tel: E-mail: Wechat:

Survey items

What Are the Main Reasons that Caused your Government-Pay  
PPP Project to be in Credit Default?

Scoring of Likert Scale

| Variables and Survey Items                              | Strongly<br>agree-1 | Agree-2 | Neutral-3 | Disagree-4 | Strongly<br>disagree-5 |
|---------------------------------------------------------|---------------------|---------|-----------|------------|------------------------|
| <b>1. Political performance:</b>                        |                     |         |           |            |                        |
| <i>M1: Political pressure</i>                           |                     |         |           |            |                        |
| <i>M2: Official corruption</i>                          |                     |         |           |            |                        |
| <i>M3: Public opposition</i>                            |                     |         |           |            |                        |
| <b>2. Fiscal illusion:</b>                              |                     |         |           |            |                        |
| <i>M4: Poor cognition</i>                               |                     |         |           |            |                        |
| <i>M5: Unreasonable guarantee</i>                       |                     |         |           |            |                        |
| <b>3. Subjective willingness:</b>                       |                     |         |           |            |                        |
| <i>M6: Abuse of power</i>                               |                     |         |           |            |                        |
| <i>M7: Repudiation of payment</i>                       |                     |         |           |            |                        |
| <i>M8: Response to policy changes</i>                   |                     |         |           |            |                        |
| <b>4. Objective limitation:</b>                         |                     |         |           |            |                        |
| <i>M9: Poor decision-making<br/>process</i>             |                     |         |           |            |                        |
| <i>M10: Lack of operational<br/>experience</i>          |                     |         |           |            |                        |
| <i>M11: Insufficient expertise in<br/>renegotiation</i> |                     |         |           |            |                        |
